# Supplementary material for: A Novel CXCR4-Targeted Diphtheria Toxin Nanoparticle Inhibits Invasion and Metastatic Dissemination in a Head and Neck Squamous Cell Carcinoma Mouse Model
Source: MDPI journal article supplement (doi:10.3390/pharmaceutics14040887), 2022-04-18
Supplement: s1 [file s1]

# Supplementary Materials: A Novel CXCR4-Targeted Diphtheria Toxin Nanoparticle Inhibits Invasion and Metastatic Dissemination in a Head-and-Neck Squamous-Cell-Carcinoma Mouse Model

Elisa Rioja-Blanco , Alberto Gallardo, Irene Arroyo-Solera, Patricia Álamo, Isolda Casanova, Ugutz Unzueta, Naroa Serna, Laura Sánchez-García, Miquel Quer, Antonio Villaverde, Esther Vázquez, Xavier León, Lorena Alba-Castellón and Ramon Mangués

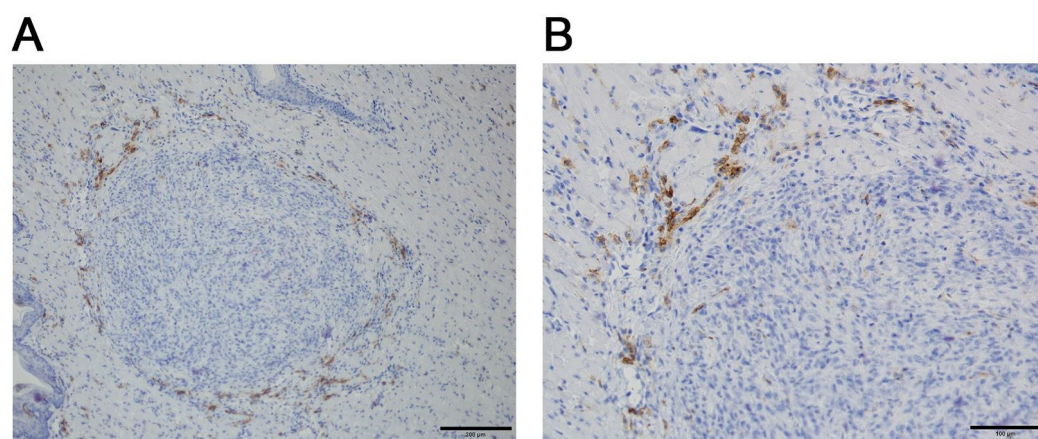

**Figure S1.** CXCR4 expression in 74B-Luci primary tumor samples in the orthotopic mouse model. CXCR4 IHC representative images of a 74B-Luci orthotopic tumor. **A)** Overall expression of CXCR4 within the primary tumor and in the tumor margins. **B)** Detailed image of the CXCR4 expression in the tumor invasive front, clearly showing a strong CXCR4 expression in the tumor budding, while primary tumor tissue presents a negligible expression of the receptor. Scale bars = 200  $\mu\text{m}$  and 100  $\mu\text{m}$ .

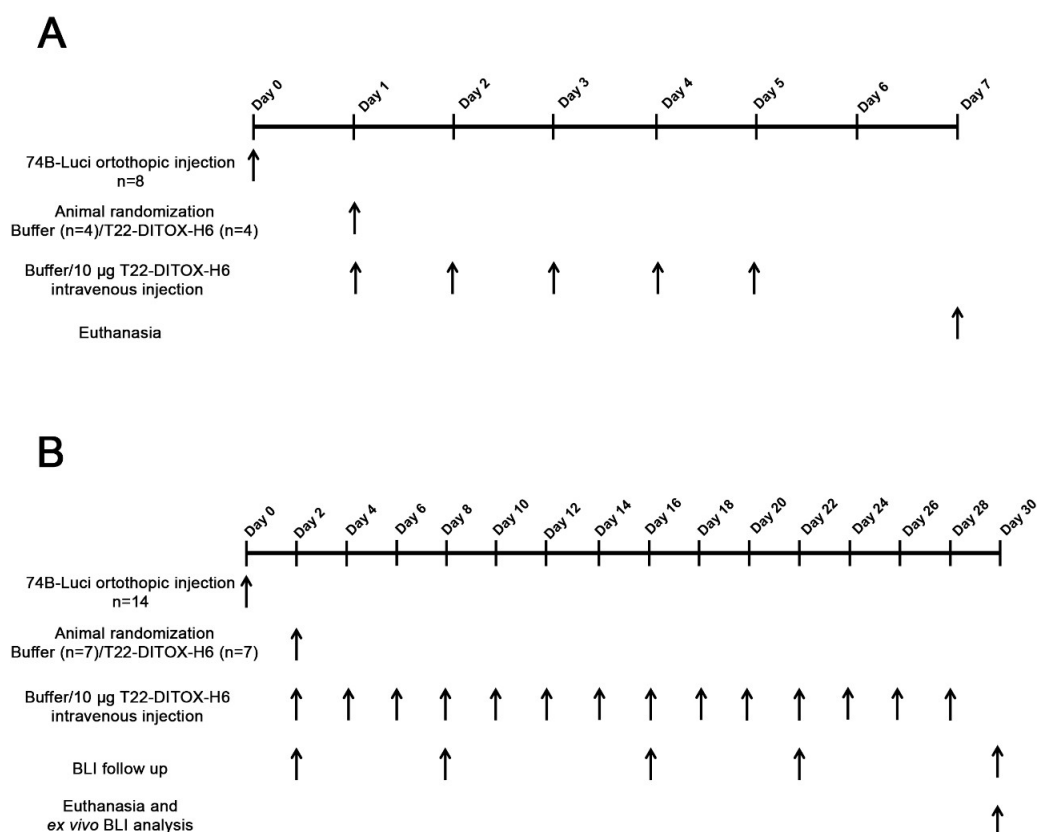

**Figure S2.** Schematic representation of the experimental design followed in the studies. **A)** Timeline of the experiment that evaluated the T22-DITOX-H6 anti-invasive effect, including all the relevant studies performed. **B)** Experimental design followed during the experiment that assessed the anti-metastatic effect of T22-DITOX-H6 repeated administration, including the study groups, animal number, details on the treatment administration and BLI acquisition, and euthanasia.

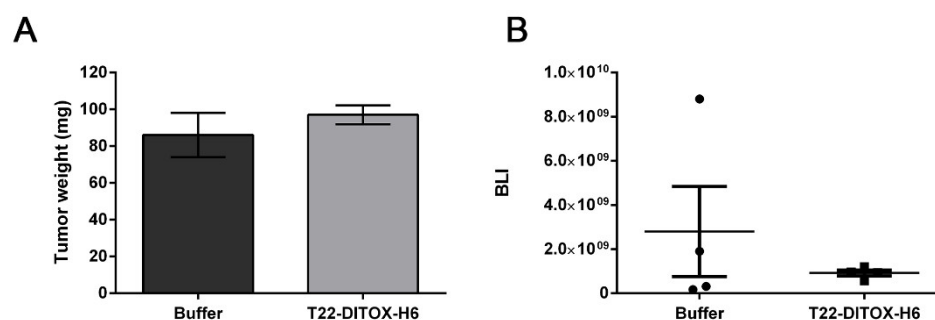

**Figure S3.** Tumor size assessment in the experiment that evaluated T22-DITOX-H6 anti-invasive effect. **A)** Tumor weight registered at euthanasia for buffer and nanotoxin-treated animals. **B)** BLI emitted by the primary tumors at the end point of the experiment in both buffer and T22-DITOX-H6 groups. No statistical differences were found between groups.  $n = 4$  per group (total animal number 8). Statistical analysis was performed by Mann-Whitney test. Error bars indicate SEM.

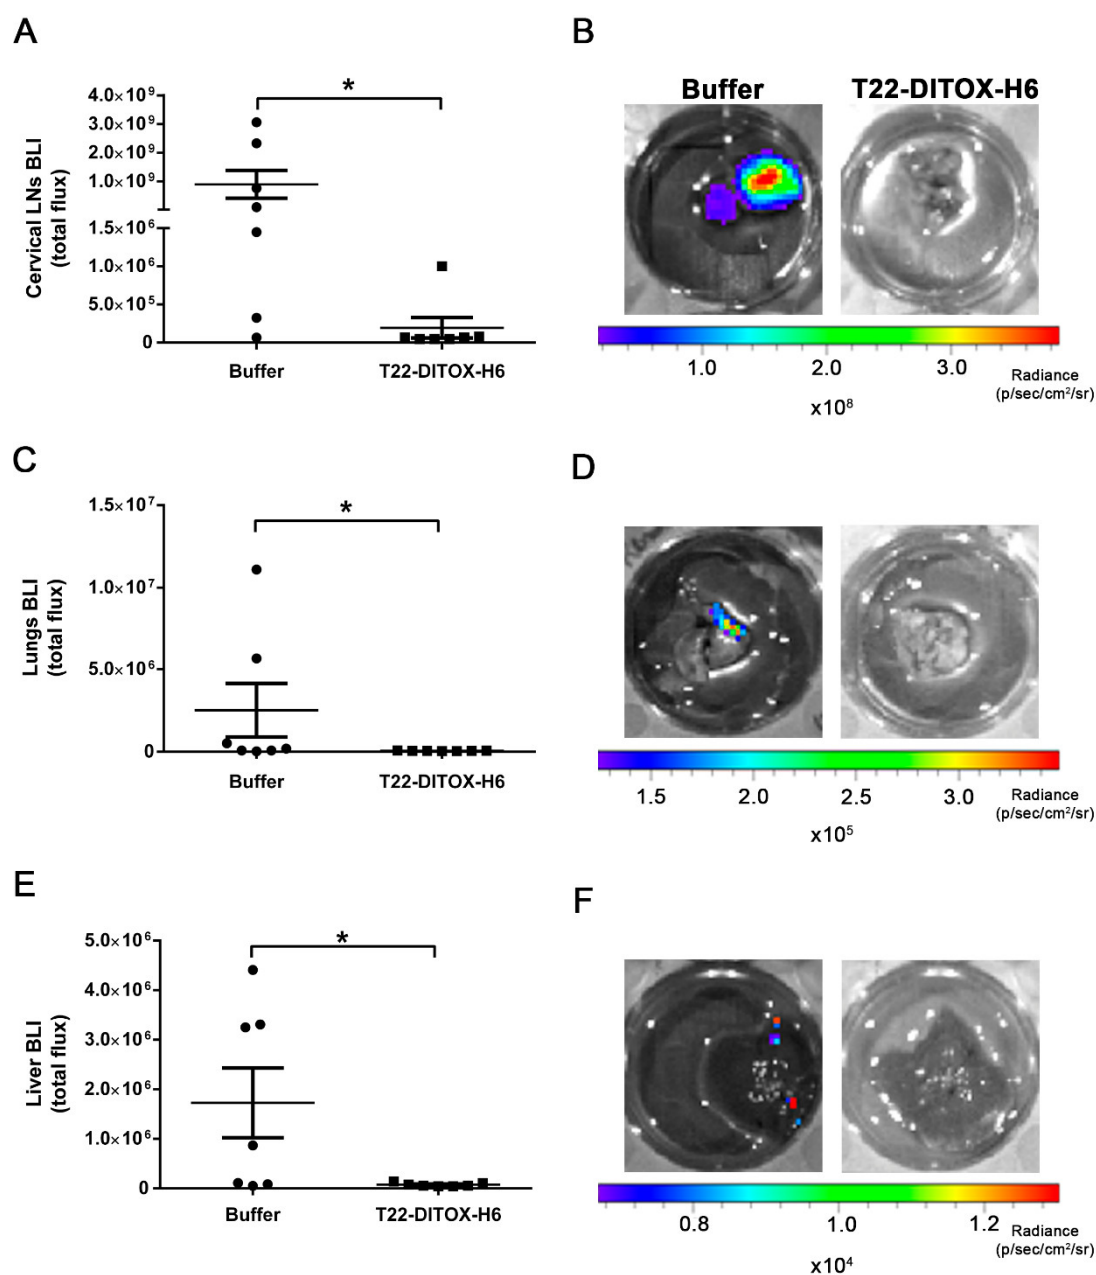

**Figure S4.** Ex vivo bioluminescence evaluation in the metastatic organs. BLI was semi-quantified in the explanted relevant organs at the endpoint of the experiment that evaluated T22-DITOX-H6 anti-metastatic effect. **A)** Semi-quantification of the BLI emitted by the explanted cervical lymph nodes obtained from buffer and nanotoxin-treated animals. **B)** Representative BLI images of cervical lymph nodes from control and T22-DITOX-H6 groups. **C)** Evaluation of the BLI emitted by lung samples from control and T22-DITOX-H6 treated mice. **D)** BLI images of a lung obtained from a control animal and a nanotoxin-treated one. **E)** Assessment of the BLI from livers explanted from buffer and T22-DITOX-H6 groups. **F)** Images showing the BLI emitted by liver samples derived from control and nanotoxin-treated animals. \*  $p < 0.05$ . Statistical analysis was performed by Mann-Whitney test. Error bars indicate SEM.

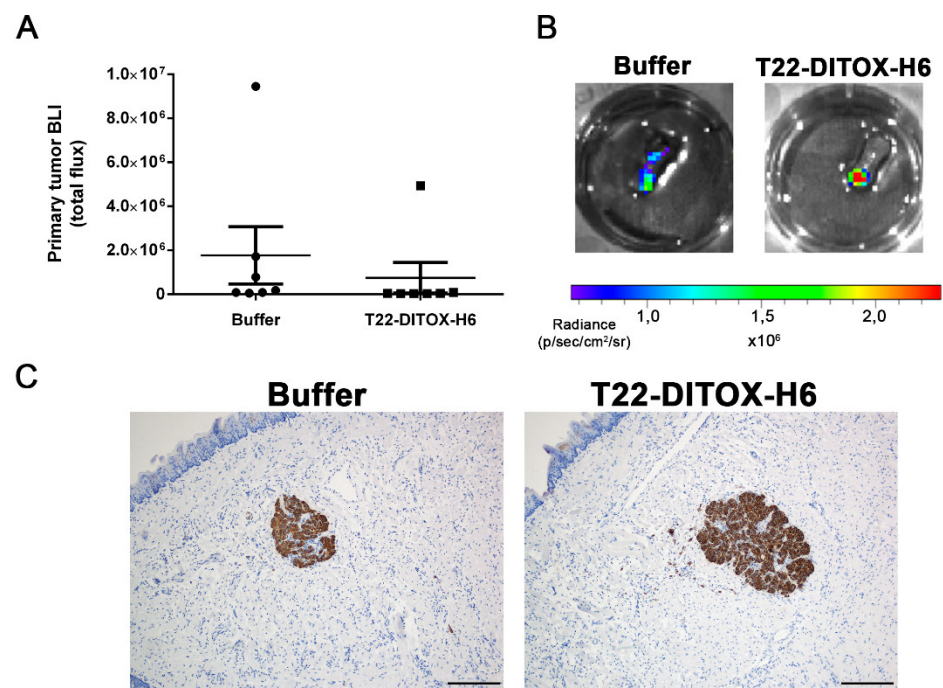

**Figure S5.** Evaluation of the primary tumor size in buffer and nanotoxin-treated animals in the experiment that evaluated T22-DITOX-H6 antimetastatic effect. **A)** Semi-quantification of the BLI emitted by primary tumors from buffer and nanotoxin-treated animals at the end of the experiment. No statistical differences were found between groups. **B)** Representative BLI images of two primary tumor samples from buffer and T22-DITOX-H6-treated animals. **C)** Anti-Human Vimentin IHC images from buffer and T22-DITOX-H6 primary tumor samples. Scale bar = 200  $\mu\text{m}$ ;  $n = 7$  per group (total animal number 14). Statistical analysis performed by Mann-Whitney test. Error bars indicate SEM.
